# Supplementary material for: Nucleosomes inhibit target cleavage by CRISPR-Cas9 in vivo
Source: PubMed Central journal article supplement — Proc Natl Acad Sci U S A. 2018 Sep 10;115(38):9351–8. doi: 10.1073/pnas.1810062115 (PMC6156633; doi:10.1073/pnas.1810062115), 2018-09-10
Supplement: pnas.1810062115.sapp.pdf [file pnas.1810062115.sapp.pdf]

## Supplementary Information for:

Nucleosomes inhibit target cleavage by CRISPR-Cas9 *in vivo*

Robert M. Yarrington, Surbhi Verma, Shaina Schwartz, Jonathan K. Trautman and Dana Carroll\*

Corresponding author: Dana Carroll

Email: [dana@biochem.utah.edu](mailto:dana@biochem.utah.edu)

### **This PDF file includes:**

Figs. S1 to S13

Tables S1 to S4

Reference for SI citation

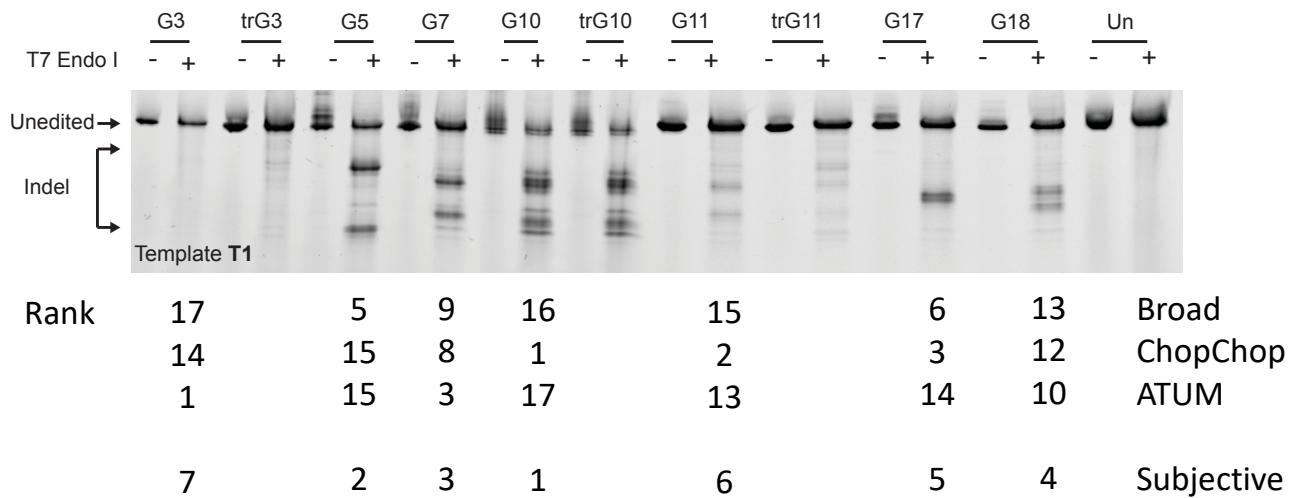

**Fig. S1.** Ranking and analysis of sgRNAs for targets in human  $\beta$ -globin Exon 1. The top portion of the figure is a T7 endonuclease assay of Cas9 mutagenesis with each of the individual sgRNAs, reprinted with permission from ref. 1. sgRNAs with 20-nt guide sequences are labeled Gn, and truncated versions of some of these are labeled trGn. In the bottom portion, ranks assigned to the full-length sgRNAs by three on-line tools are tabulated. The web sites were given the full Exon 1 sequence. At the very bottom is a subjective assessment of the rank order of observed activities. The web searches were performed in January, 2017. Current web addresses are: Broad, <https://portals.broadinstitute.org/gpp/public/analysis-tools/sgrna-design>; ChopChop, <http://chopchop.cbu.uib.no/>; ATUM, <https://www.atum.bio/eCommerce/cas9/input>. Ranks assigned by the on-line tools do not agree well with each other, and none of them corresponds particularly well to the observed mutagenesis levels.

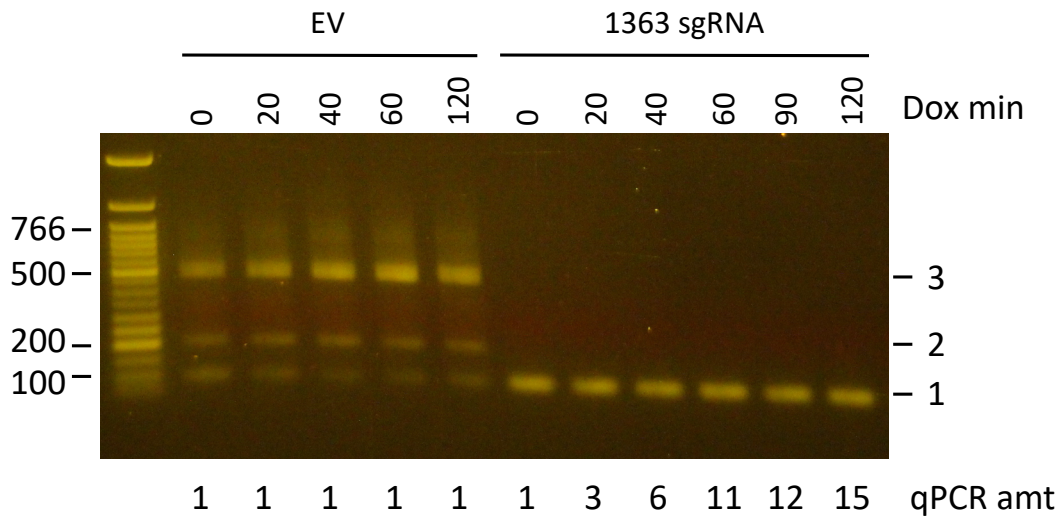

**Fig. S2.** Analysis of sgRNA expression. RNA was isolated at the indicated times after induction of sgRNA synthesis with doxycycline (Dox min) and subjected to strand-specific qPCR, using primers for the *HO* 1363 sgRNA. DNA samples from qPCR at saturation were analyzed by electrophoresis in a 1.5 % agarose gel. Cells carried an empty sgRNA vector (EV) or a vector expressing the sgRNA for the 1363 target in the *HO* promoter. Some marker fragment sizes in the NEB Quick-Load 50 bp DNA ladder are shown on the left, in base pairs. Bands were excised from the gel and subjected to DNA sequencing. Bands 1, 2 and 3 from the EV samples were all artifacts with sequences corresponding to portions of the yeast ribosomal precursor RNA. Band 1 from the 1363 samples showed only the expected sgRNA sequence. Values below each lane are the levels of RNA as measured by qPCR relative to the 0 minute time point. Thus, sgRNA was present at a low level prior to induction with doxycycline and was strongly induced at later times.

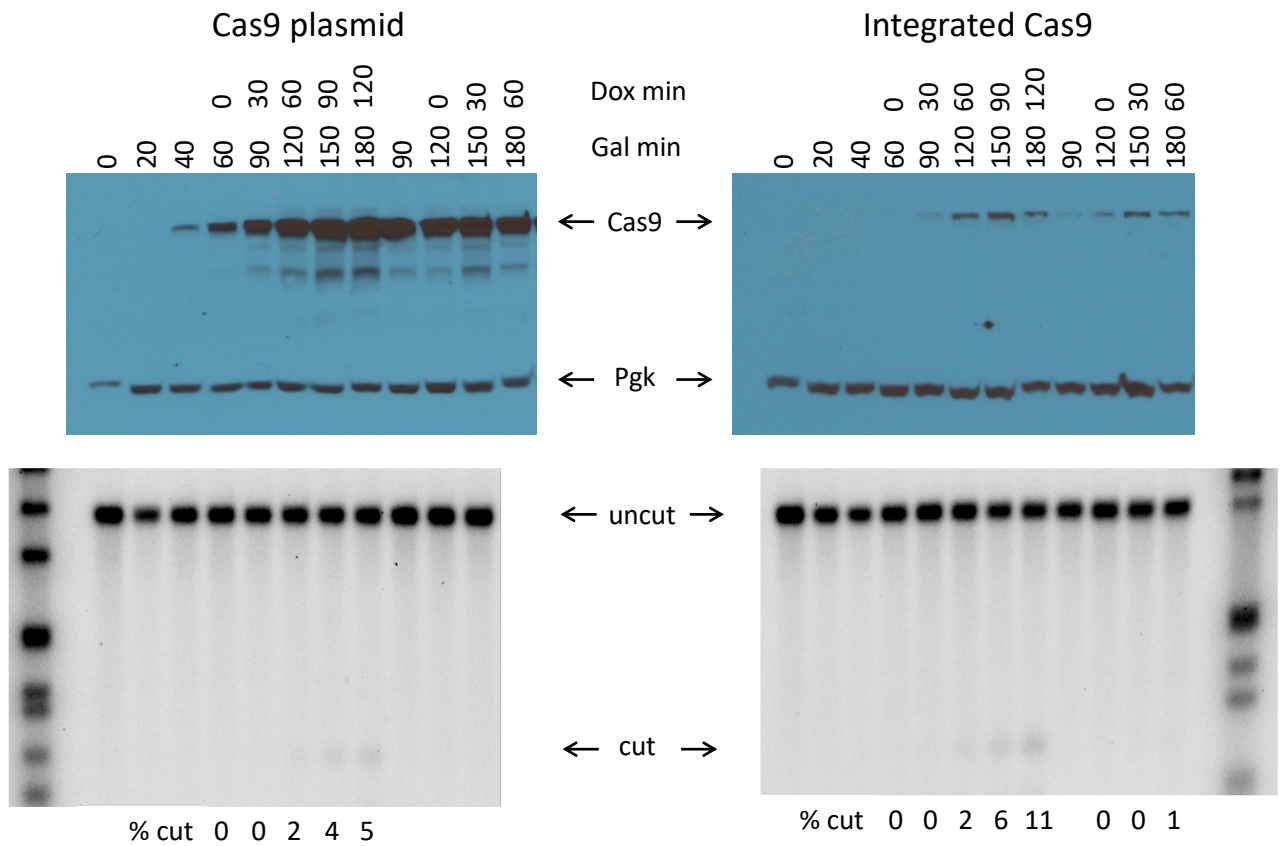

**Fig. S3.** Cleavage efficiency does not correlate with the level of Cas9 expression. Galactose-inducible Cas9 was expressed either from a low-copy plasmid (left) or an integrated gene (right). Western blots (top) show time courses of expression of Cas9 protein. Southern blots show cleavage mediated by the *HO* 1339 sgRNA at the same time points. In samples on the left of each image, sgRNA expression was induced by doxycycline addition 60 minutes after Cas9 induction with galactose. In the four samples on the right, doxycycline was added 120 minutes after galactose. Neither the apparent level of Cas9 protein nor the timing of sgRNA induction by doxycycline had a significant effect on cleavage efficiency. The *GAL* promoters on the plasmid and integrated Cas9 genes were essentially identical.



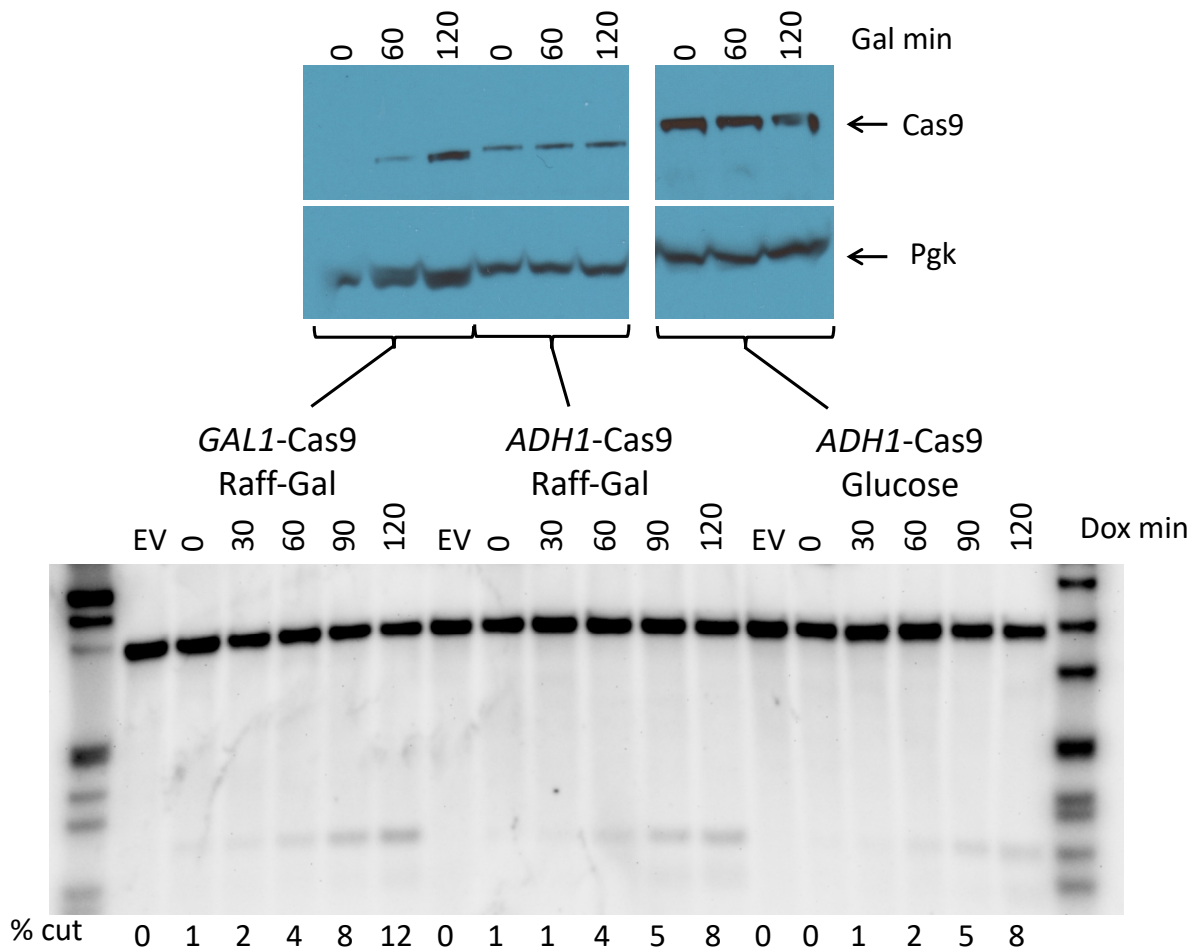

**Fig. S4.** Comparable levels of cleavage were seen with integrated Cas9 expressed from a *GAL1* promoter and from a constitutive *ADH1* promoter. A Western blot (top) shows expression levels of Cas9 protein after growth in raffinose and at various times after galactose induction (left) and a parallel sample grown in glucose (right). *GAL1*-Cas9 protein shows an increase with time, while the *ADH1*-Cas9 level was constant. The Southern blot (bottom) shows levels of cleavage for comparable samples in a time course after doxycycline induction of the *HO 1363* sgRNA. Cleavage efficiency was slightly lower with the *ADH1*-Cas9.

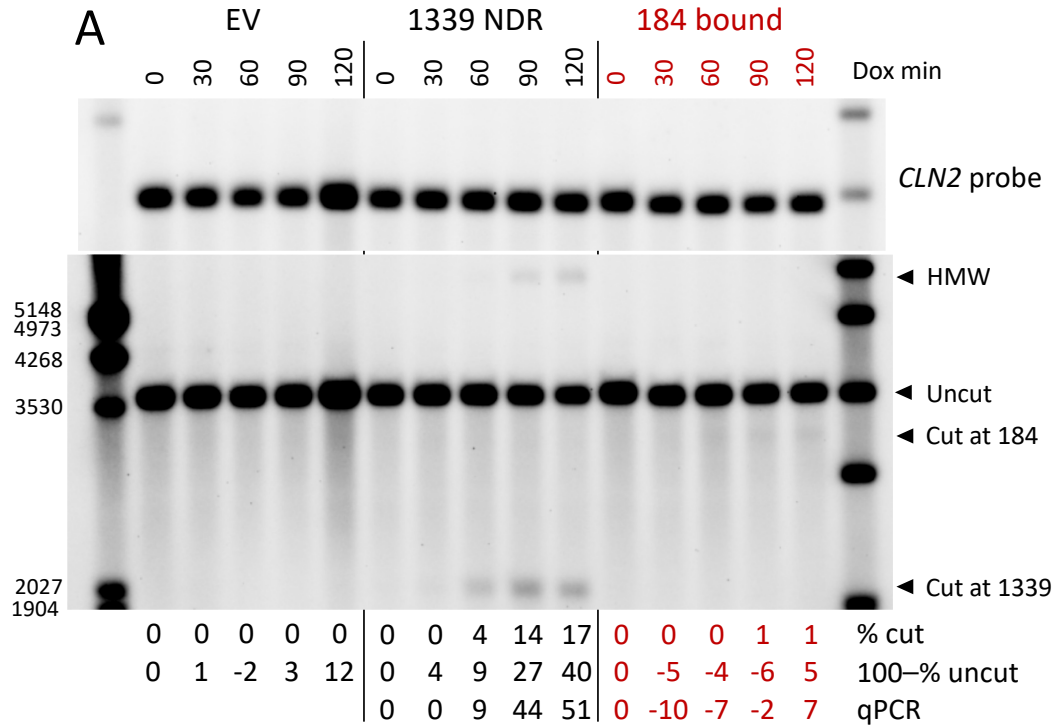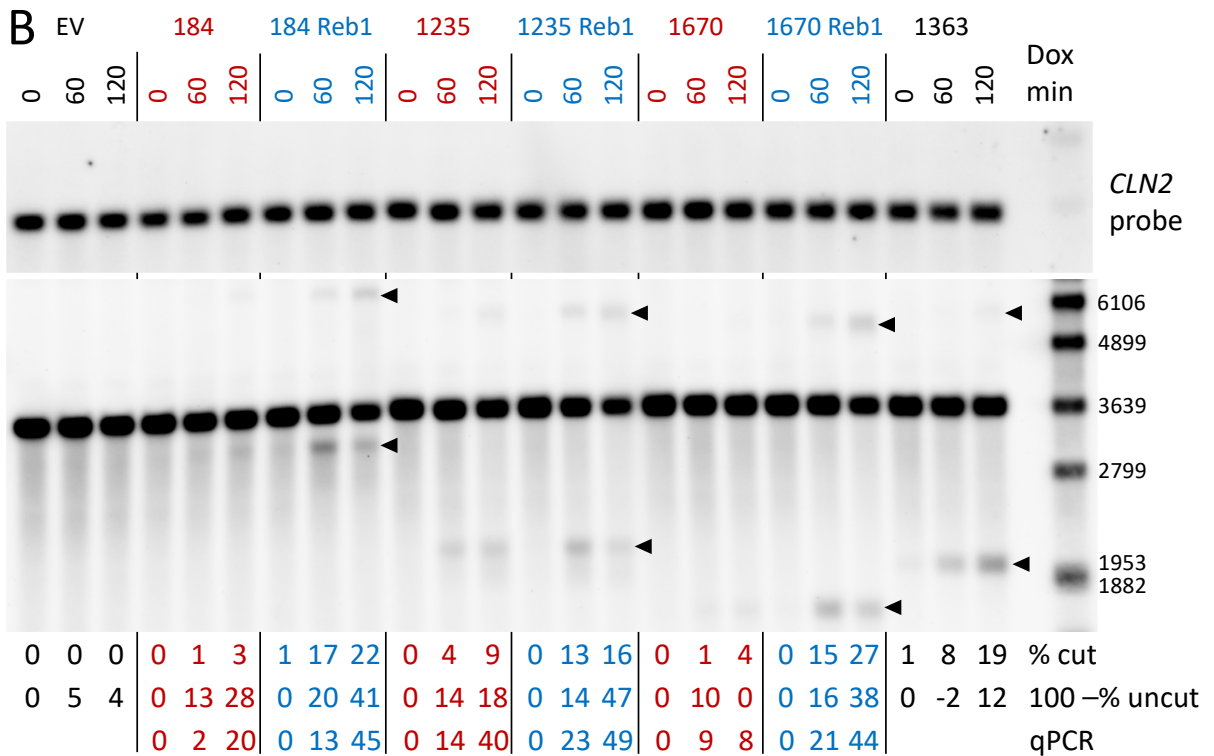

**Fig. S5.** Quantitation of the Southern blots in Figs. 1B (A) and 2C (B) by three methods. In each case, the result of stripping the blot and rehybridizing with a

probe for the *CLN2* promoter is shown. Using Fiji software, rows labeled “% cut” for each lane were quantitated by adding the intensity of the cut band and twice the intensity of the HMW band and dividing by that sum plus the intensity of the uncut band. In the rows labeled “100–% uncut” the ratio of the intensity of the uncut band in each lane was divided by the intensity of the corresponding *CLN2* band and normalized to the 0 minute time point for each target. “qPCR” reflects the loss of amplifiable (i.e., uncut) target DNA, normalized to *RPR1* in each sample and to the 0 minute time point; the EV and 1363 samples were not quantitated by qPCR. Some marker fragment sizes are shown, in base pairs.

In samples where the % cut is low, the values based on loss of uncut target are variable and sometimes negative. When the % cut is high, the 100–% uncut values are substantially higher. This likely reflects loss of hybridizable material in those samples that cannot be detected as bands. The differences between nucleosome-bound and NDR sites and between WT and Reb1 sites are retained regardless of the quantitation method.

In the right-most lanes in panel B, the failure of the 100–% uncut approach to report higher levels of cleavage may be due to non-uniform hybridization in that region with the *CLN2* probe.

sgRNA Time

EV 120'  
 184 0'  
 184 60'  
 184 120'  
 1339 0'  
 1339 60'  
 1339 120'  
 EV 0'

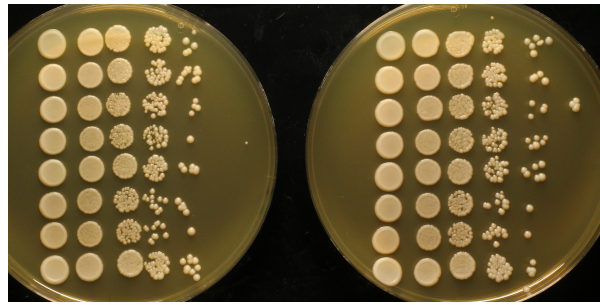

YPAD

EV 120'  
 184 0'  
 184 60'  
 184 120'  
 1339 0'  
 1339 60'  
 1339 120'  
 EV 0'

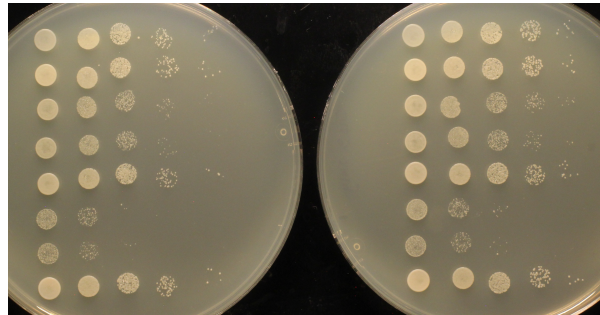

SC-His + Gal  
 (Cas9)

EV 120'  
 184 0'  
 184 60'  
 184 120'  
 1339 0'  
 1339 60'  
 1339 120'  
 EV 0'

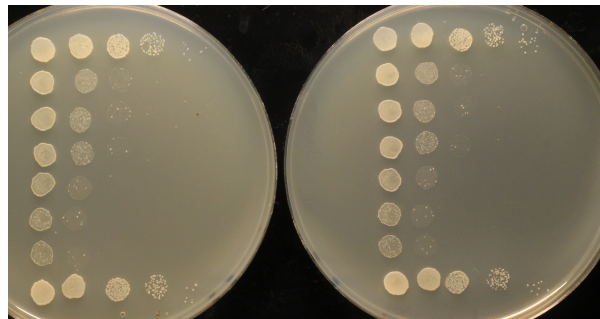

SC-His + Gal + Dox  
 (Cas9 + sgRNA)

**Fig. S6.** Viability assays. Cultures were treated as for cleavage assays. Cas9 expression was induced in all samples; sgRNAs were induced with doxycycline (Dox) for the times indicated in liquid culture. Zero-time samples received no Dox. Ten-fold dilutions of these cultures were spotted onto the indicated plates: YPAD, rich medium; SC-His + Gal, selects for the sgRNA plasmid and continues Cas9 induction with galactose; SC-His + Gal + Dox, as above, but with continuing induction of sgRNA.

All samples grew well on YPAD (top), but there appears to be a slight deficit in the induced 1339 sgRNA cells, presumably due to the cleavage that had occurred in liquid culture. Given the levels of cleavage measured in those samples ( $\leq 50\%$ ) and the possibility of repair, extensive loss of viability is not

expected. When the sgRNA was induced in culture, viability was reduced with the continued expression of Cas9 (middle), presumably due to perdurance of the sgRNA. The effect on viability is more pronounced with the 1339 sgRNA than with the 184 sgRNA. With continued expression of both Cas9 and sgRNA (bottom), all the sgRNA-carrying cells show sharply reduced viability, perhaps somewhat more severe with 1339 sgRNA.

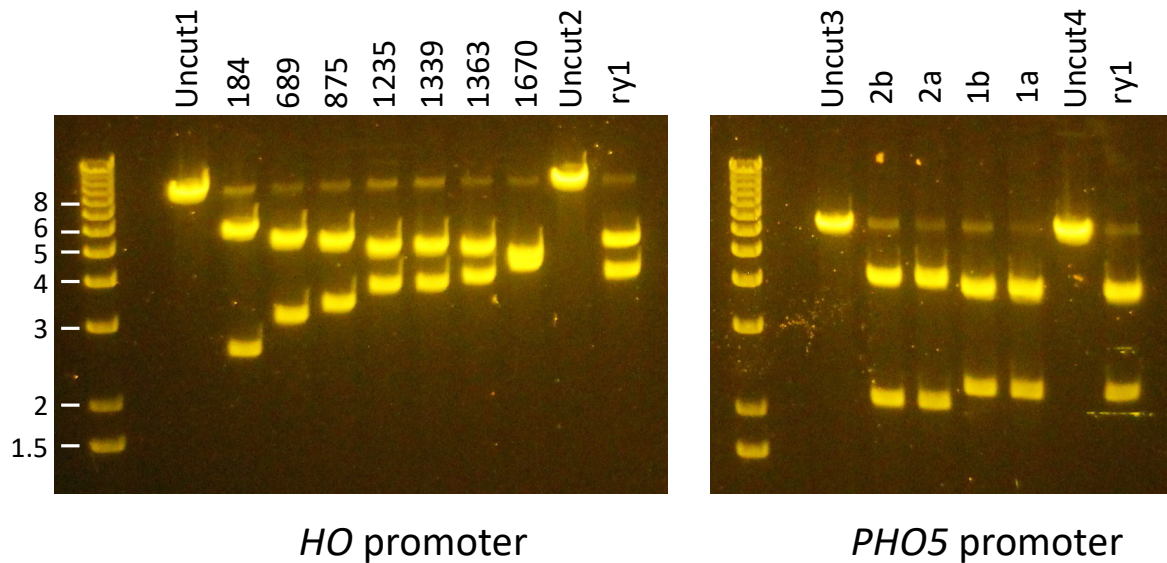

**Fig. S7.** Biochemical assays of Cas9 cleavage with sgRNAs used in these studies. Cas9 was assembled with each of the indicated sgRNAs and incubated with the appropriate linearized plasmid DNA substrate as described in Materials and Methods. The uncut samples are: Uncut1, wild type *HO* promoter (total length, 8.8 kb); Uncut2, *HO* promoter with the ry substitution at 1339 (8.8 kb); Uncut3, wild type *PHO5* promoter (6.65 kb); Uncut4, *PHO5* promoter with the ry substitution at 1a (6.65 kb). Sizes of marker fragments in the Invitrogen 1 Kb plus ladder are indicated on the left, in kb. The ratio of Cas9-sgRNA to DNA substrate is quite high in these assays, so they do not reflect relative activities of the various sgRNAs. Rather they are intended to show that all of the sgRNAs are functional.

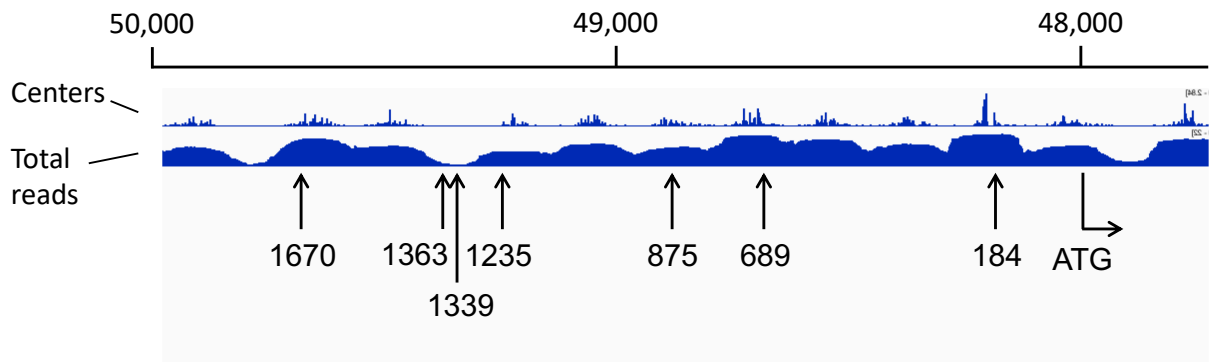

*S. cerevisiae* chromosome IV: 50,000-47,750

**Fig. S8.** Nucleosome occupancy at the *HO* promoter determined by micrococcal nuclease mapping. The locations of the translation start (ATG) and the various sgRNA targets are indicated. The NDR in which the 1339 and 1363 targets are located is apparent. The level of nucleosome occupancy at the 875 and 1235 targets is clearly lower than at the other bound sites (184, 689, 1670). Data from McCullough, L, Pham, T.H., Chandrasekharan, M.B., Parnell, T.J., Stillman, D.J., Formosa, T. Manipulation of histone H3-K56 Acetylation reveals transcription-independent roles for FACT in establishing chromatin architecture, manuscript in preparation.

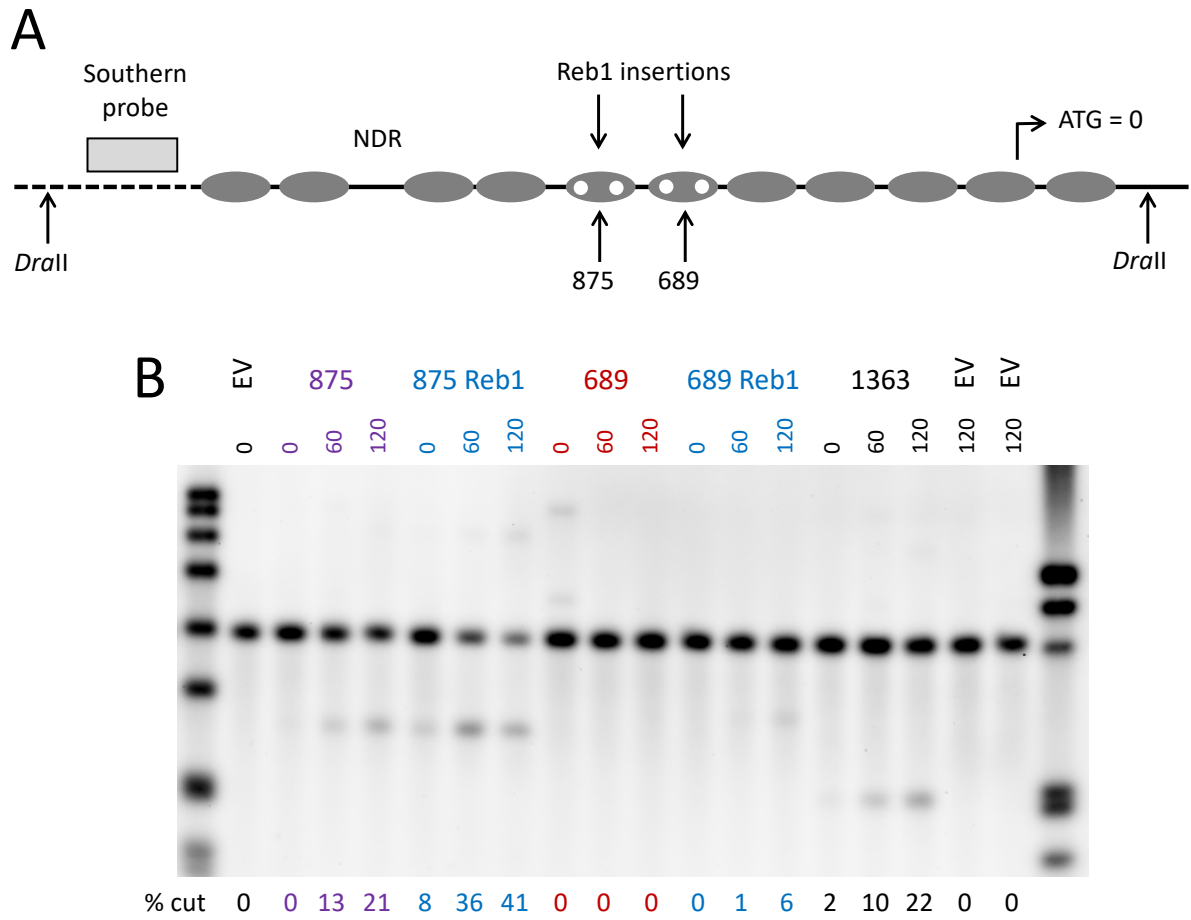

**Fig. S9.** Enhancement of cleavage at the *HO* 875 and 689 targets in the Reb1 site insertions. (A) Diagram of the paired Reb1 site insertions, each in a separate strain. (B) Southern blot showing Cas9 cleavage at 875 and 689 in wild type and Reb1 strains. Color scheme as in Figs. 1C and 2C. The empty vector samples are, from left to right, for the WT strain, 875 Reb1 and 689 Reb1.



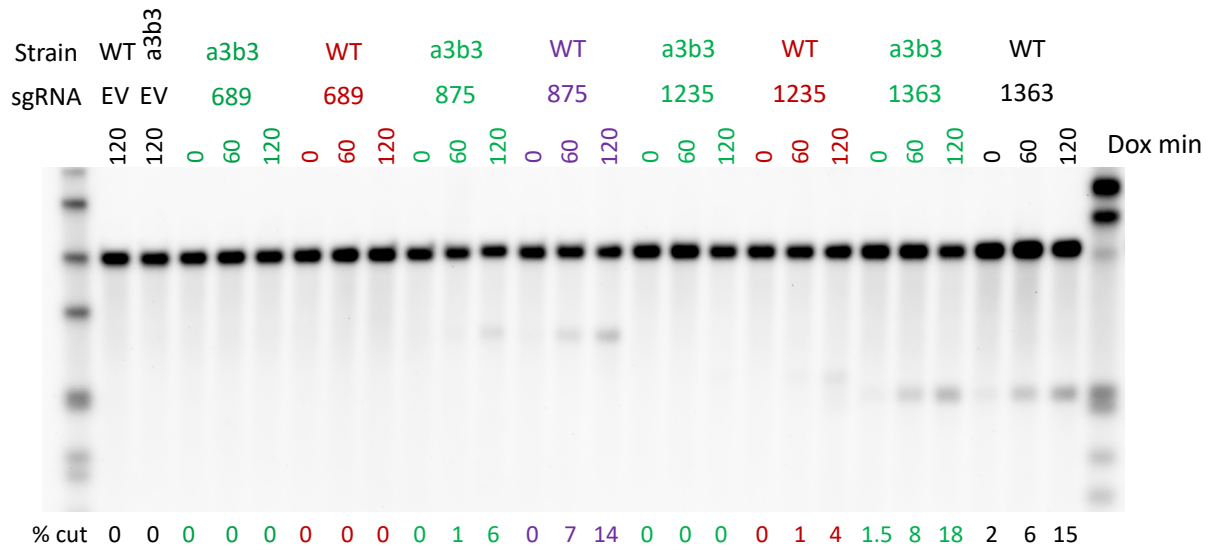

**Fig. S10.** Southern blot showing cleavage at the *HO* promoter 689, 875, 1235 and 1363 targets in the a3b3 strain, in which natural nucleosome eviction is suppressed by mutation of two Swi5 binding sites. There was little or no effect on the poorly cut 689 target or the robustly cut 1363 target, neither of which is in an area affected by Swi5 binding. Cleavage at both 875 and 1235 was markedly reduced in the a3b3 strain. Color scheme as in Figs. 1C and 2C, plus a3b3 in green.

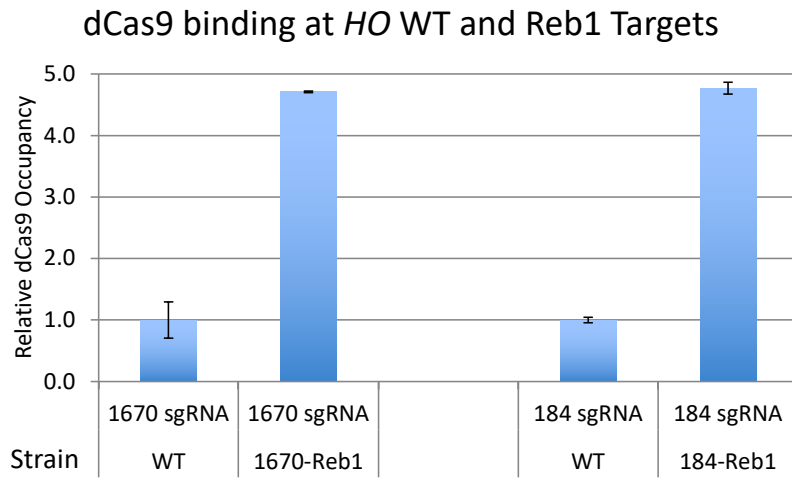

**Fig. S11.** Binding of dCas9 to the 184 and 1670 targets without and with Reb1 insertions. Values in the Reb1 strains are presented relative to WT, and error bars represent standard deviations of at least four measurements from two biological replicates.

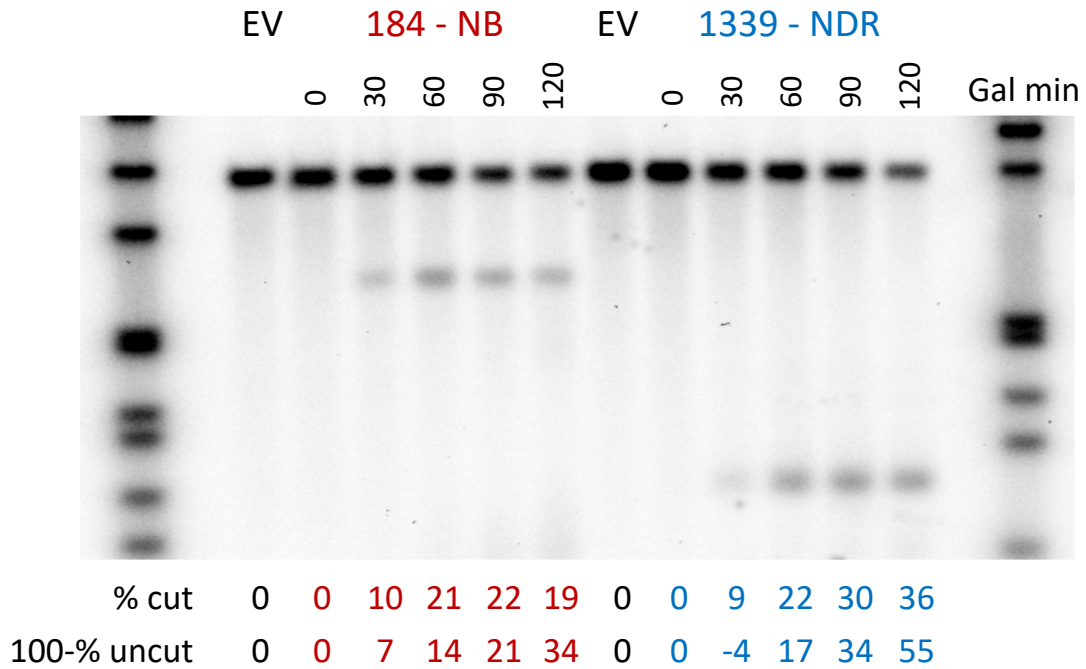

**Fig. S12.** Time course of ZFN cleavage at the *HO* 184 and 1339 targets. Cleavage is seen at 30 minutes after nuclease induction by galactose, sooner than typically observed with Cas9 after sgRNA induction. Digestion of genomic DNA for this blot was done with *NdeI* + *NgoMIV* rather than *DraII*. ZFN cutting was stronger in this experiment than in the one shown in Fig. 6C. Two methods of quantitating the level of cleavage are shown.

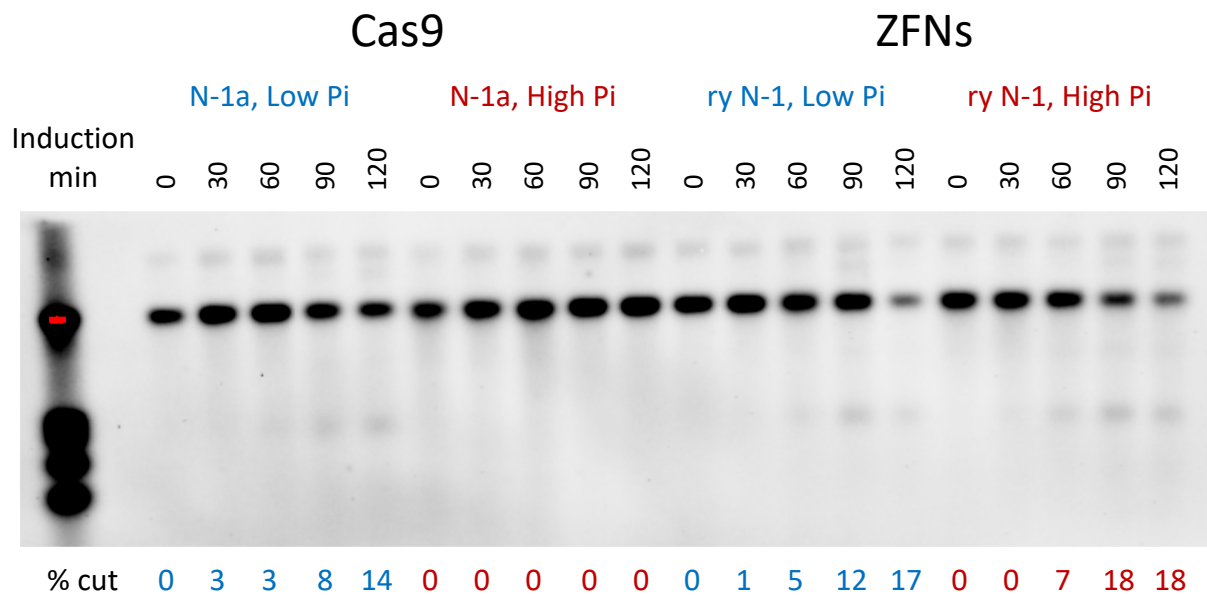

**Fig. S13.** Southern blot showing Cas9 and ZFN cleavage at the -1 nucleosome in the PHO5 promoter in low and high phosphate media. The Cas9 results were obtained in a wild type strain; those for the ZFNs in a strain with a ry replacement at the 1a site. Times in minutes are those following doxycycline addition for Cas9 and galactose addition for ZFNs.

## Supplementary Tables

**Table S1. Yeast strains**

| Strain | Genotype                                                                                                                                    | Plasmid | Notes |
|--------|---------------------------------------------------------------------------------------------------------------------------------------------|---------|-------|
| FIG 1  |                                                                                                                                             |         |       |
| DCY136 | <i>MATa URA3::GALp::yCas9::HphMX ade2 can1 his3 leu2 trp1 ura3</i>                                                                          | MC037   |       |
| DCY138 | <i>MATa URA3::GALp::yCas9::HphMX ade2 can1 his3 leu2 trp1 ura3</i>                                                                          | MC038   |       |
| DCY140 | <i>MATa URA3::GALp::yCas9::HphMX ade2 can1 his3 leu2 trp1 ura3</i>                                                                          | MC039   |       |
| DCY142 | <i>MATa URA3::GALp::yCas9::HphMX ade2 can1 his3 leu2 trp1 ura3</i>                                                                          | MC036   |       |
| DCY270 | <i>MATa URA3::GALp::yCas9::HphMX ade2 can1 his3 leu2 trp1 ura3</i>                                                                          | MC040   |       |
| DCY271 | <i>MATa URA3::GALp::yCas9::HphMX ade2 can1 his3 leu2 trp1 ura3</i>                                                                          | MC041   |       |
| DCY272 | <i>MATa URA3::GALp::yCas9::HphMX ade2 can1 his3 leu2 trp1 ura3</i>                                                                          | MC042   |       |
| DCY280 | <i>MATa URA3::GALp::yCas9::HphMX ade2 can1 his3 leu2 trp1 ura3</i>                                                                          | MC060   |       |
| FIG 2  |                                                                                                                                             |         |       |
| DCY136 | <i>MATa URA3::GALp::yCas9::HphMX ade2 can1 his3 leu2 trp1 ura3</i>                                                                          | MC037   |       |
| DCY138 | <i>MATa URA3::GALp::yCas9::HphMX ade2 can1 his3 leu2 trp1 ura3</i>                                                                          | MC038   |       |
| DCY142 | <i>MATa URA3::GALp::yCas9::HphMX ade2 can1 his3 leu2 trp1 ura3</i>                                                                          | MC036   |       |
| DCY271 | <i>MATa URA3::GALp::yCas9::HphMX ade2 can1 his3 leu2 trp1 ura3</i>                                                                          | MC041   |       |
| DCY272 | <i>MATa URA3::GALp::yCas9::HphMX ade2 can1 his3 leu2 trp1 ura3</i>                                                                          | MC042   |       |
| DCY309 | <i>MATa URA3::GALp::yCas9::HphMX HO[-240 to -232 deleted]:TTTACCCG HO[-160 to -152 deleted]:TTTACCCG ade2 can1 his3 leu2 trp1 ura3</i>      | MC037   | Reb1  |
| DCY311 | <i>MATa URA3::GALp::yCas9::HphMX HO[-1708 to -1700 deleted]:TTTACCCG HO[-1628 to -11620 deleted]:TTTACCCG ade2 can1 his3 leu2 trp1 ura3</i> | MC042   | Reb1  |

|        |                                                                                                                                             |       |      |
|--------|---------------------------------------------------------------------------------------------------------------------------------------------|-------|------|
| DCY313 | <i>MATa URA3::GALp::yCas9::HphMX HO[-1268 to -1261 deleted]:TTACCCG HO[-1194 to -1187 deleted]:TTACCCG ade2 can1 his3 leu2 trp1 ura3</i>    | MC038 | Reb1 |
| FIG 3  |                                                                                                                                             |       |      |
| DCY136 | <i>MATa URA3::GALp::yCas9::HphMX ade2 can1 his3 leu2 trp1 ura3</i>                                                                          | MC037 |      |
| DCY138 | <i>MATa URA3::GALp::yCas9::HphMX ade2 can1 his3 leu2 trp1 ura3</i>                                                                          | MC038 |      |
| DCY270 | <i>MATa URA3::GALp::yCas9::HphMX ade2 can1 his3 leu2 trp1 ura3</i>                                                                          | MC040 |      |
| DCY271 | <i>MATa URA3::GALp::yCas9::HphMX ade2 can1 his3 leu2 trp1 ura3</i>                                                                          | MC041 |      |
| DCY272 | <i>MATa URA3::GALp::yCas9::HphMX ade2 can1 his3 leu2 trp1 ura3</i>                                                                          | MC042 |      |
| DCY280 | <i>MATa URA3::GALp::yCas9::HphMX ade2 can1 his3 leu2 trp1 ura3</i>                                                                          | MC060 |      |
| DCY309 | <i>MATa URA3::GALp::yCas9::HphMX HO[-240 to -232 deleted]:TTTACCCG HO[-160 to -152 deleted]:TTTACCCG ade2 can1 his3 leu2 trp1 ura3</i>      | MC037 | Reb1 |
| DCY311 | <i>MATa URA3::GALp::yCas9::HphMX HO[-1708 to -1700 deleted]:TTTACCCG HO[-1628 to -11620 deleted]:TTTACCCG ade2 can1 his3 leu2 trp1 ura3</i> | MC042 | Reb1 |
| DCY313 | <i>MATa URA3::GALp::yCas9::HphMX HO[-1268 to -1261 deleted]:TTACCCG HO[-1194 to -1187 deleted]:TTACCCG ade2 can1 his3 leu2 trp1 ura3</i>    | MC038 | Reb1 |
| DCY450 | <i>MATa URA3::GALp::yCas9::HphMX HO[-1818 to -1812 deleted]:TATTCC HO[-1309 to -1299 deleted]:TCGTATCATT ade2 can1 his3 leu2 trp1 ura3</i>  | MC040 | a3b3 |
| DCY452 | <i>MATa URA3::GALp::yCas9::HphMX HO[-1818 to -1812 deleted]:TATTCC HO[-1309 to -1299 deleted]:TCGTATCATT ade2 can1 his3 leu2 trp1 ura3</i>  | MC060 | a3b3 |
| DCY454 | <i>MATa URA3::GALp::yCas9::HphMX HO[-1818 to -1812 deleted]:TATTCC HO[-1309 to -1299 deleted]:TCGTATCATT ade2 can1 his3 leu2 trp1 ura3</i>  | MC038 | a3b3 |
| DCY456 | <i>MATa URA3::GALp::yCas9::HphMX HO[-1818 to -1812 deleted]:TATTCC HO[-1309 to -1299 deleted]:TCGTATCATT ade2 can1 his3 leu2 trp1 ura3</i>  | MC041 | a3b3 |
| DCY460 | <i>MATa URA3::GALp::yCas9::HphMX HO[-725 to -717 deleted]:TTTACCCG HO[-671 to -663 deleted]:TTTACCCG ade2 can1 his3 leu2 trp1 ura3</i>      | MC040 | a3b3 |

|        |                                                                                                                                        |              |                     |
|--------|----------------------------------------------------------------------------------------------------------------------------------------|--------------|---------------------|
| DCY464 | <i>MATa URA3::GALp::yCas9::HphMX HO[-913 to -905 deleted]:TTTACCCG HO[-838 to -830 deleted]:TTTACCCG ade2 can1 his3 leu2 trp1 ura3</i> | MC060        | Reb1                |
| FIG 4  |                                                                                                                                        |              |                     |
| DCY146 | <i>MATa URA3::GALp::yCas9::HphMX ade2 can1 his3 leu2 trp1 ura3</i>                                                                     | MC051        |                     |
| DCY148 | <i>MATa URA3::GALp::yCas9::HphMX ade2 can1 his3 leu2 trp1 ura3</i>                                                                     | MC050        |                     |
| DCY201 | <i>MATa ade2 can1 his3 leu2 trp1 ura3</i>                                                                                              | MC036        |                     |
| DCY202 | <i>MATa ade2 can1 his3 leu2 trp1 ura3</i>                                                                                              | MC036        |                     |
| FIG 5  |                                                                                                                                        |              |                     |
| DCY203 | <i>MATa PHO85(F82G) ade2 can1 his3 leu2 trp1 ura3</i>                                                                                  | MC036        |                     |
| DCY204 | <i>MATa PHO85(F82G) ade2 can1 his3 leu2 trp1 ura3</i>                                                                                  | MC036        |                     |
| DCY233 | <i>MATa URA3::GALp::yCas9::HphMX PHO85(F82G) ade2 can1 his3 leu2 trp1 ura3</i>                                                         | MC036        | <i>pho85 (F82G)</i> |
| DCY239 | <i>MATa URA3::GALp::yCas9::HphMX PHO85(F82G) ade2 can1 his3 leu2 trp1 ura3</i>                                                         | MC049        | <i>pho85 (F82G)</i> |
| DCY241 | <i>MATa URA3::GALp::yCas9::HphMX PHO85(F82G) ade2 can1 his3 leu2 trp1 ura3</i>                                                         | MC048        | <i>pho85 (F82G)</i> |
| DCY243 | <i>MATa URA3::GALp::yCas9::HphMX PHO85(F82G) ade2 can1 his3 leu2 trp1 ura3</i>                                                         | MC051        | <i>pho85 (F82G)</i> |
| DCY245 | <i>MATa URA3::GALp::yCas9::HphMX PHO85(F82G) ade2 can1 his3 leu2 trp1 ura3</i>                                                         | MC050        | <i>pho85 (F82G)</i> |
| FIG 6  |                                                                                                                                        |              |                     |
| DCY142 | <i>MATa URA3::GALp::yCas9::HphMX ade2 can1 his3 leu2 trp1 ura3</i>                                                                     | MC036        |                     |
| DCY157 | <i>MATa HO[-202 to -178 deleted]:AGCTACTACACGAATGGCGCGTGGGA ade2 can1 his3 leu2 trp1 ura3</i>                                          | M3844, MC036 | ry                  |
| DCY159 | <i>MATa HO[-202 to -178 deleted]:AGCTACTACACGAATGGCGCGTGGGA ade2 can1 his3 leu2 trp1 ura3</i>                                          | MC030, MC031 | ry                  |
| DCY161 | <i>MATa HO[-1346 to -1322 deleted]:AGCTACTACACGAATGGCGCGTGGGA ade2 can1 his3 leu2 trp1 ura3</i>                                        | M3844, MC036 | ry                  |
| DCY163 | <i>MATa HO[-1346 to -1322 deleted]:AGCTACTACACGAATGGCGCGTGGGA ade2 can1 his3 leu2 trp1 ura3</i>                                        | MC030, MC031 | ry                  |

|        |                                                                                                                                          |                 |                           |
|--------|------------------------------------------------------------------------------------------------------------------------------------------|-----------------|---------------------------|
| DCY434 | <i>MATa URA3::GALp::yCas9::HphMX HO[-202 to -178 deleted]:AGCTACTACACGAATGGCGCGTGGGA ade2 can1 his3 leu2 trp1 ura3</i>                   | MC044           | ry                        |
| DCY438 | <i>MATa URA3::GALp::yCas9::HphMX HO[-202 to -178 deleted]:AGCTACTACACGAATGGCGCGTGGGA ade2 can1 his3 leu2 trp1 ura3</i>                   | MC036           | ry                        |
| DCY440 | <i>MATa URA3::GALp::yCas9::HphMX HO[-1346 to -1322 deleted]:AGCTACTACACGAATGGCGCGTGGGA ade2 can1 his3 leu2 trp1 ura3</i>                 | MC044           | ry                        |
| DCY444 | <i>MATa URA3::GALp::yCas9::HphMX HO[-1346 to -1322 deleted]:AGCTACTACACGAATGGCGCGTGGGA ade2 can1 his3 leu2 trp1 ura3</i>                 | MC036           | ry                        |
| DCY446 | <i>MATa URA3::GALp::yCas9::HphMX HO[-1268 to -1261 deleted]:TTACCCG HO[-1194 to -1187 deleted]:TTACCCG ade2 can1 his3 leu2 trp1 ura3</i> | MC036           | Reb1                      |
| FIG 7  |                                                                                                                                          |                 |                           |
| DCY408 | <i>MATa PHO85(F82G) ade2 can1 his3 leu2 trp1 ura3</i>                                                                                    | M3844,<br>MC036 | <i>pho85 (F82G)</i>       |
| DCY410 | <i>MATa PHO85(F82G) ade2 can1 his3 leu2 trp1 ura3</i>                                                                                    | M3844,<br>MC036 | <i>pho85 (F82G)</i>       |
| DCY412 | <i>MATa PHO85(F82G) PHO5:[-68 to -92]::AGCTACTACACGAATGGCGTGGGA ade2 can1 his3 leu2 trp1 ura3</i>                                        | M3844,<br>MC036 | ry<br><i>pho85 (F82G)</i> |
| DCY414 | <i>MATa PHO85(F82G) PHO5:[-68 to -92]::AGCTACTACACGAATGGCGTGGGA ade2 can1 his3 leu2 trp1 ura3</i>                                        | M3844,<br>MC036 | ry<br><i>pho85 (F82G)</i> |
| DCY416 | <i>MATa PHO85(F82G) PHO5:[-68 to -92]::AGCTACTACACGAATGGCGTGGGA ade2 can1 his3 leu2 trp1 ura3</i>                                        | MC030,<br>MC031 | ry<br><i>pho85 (F82G)</i> |
| DCY549 | <i>MATa URA3::GALp::yCas9::HphMX PHO85(F82G) PHO5:[-68 to -92]::AGCTACTACACGAATGGCGTGGGA ade2 can1 his3 leu2 trp1 ura3</i>               | MC036           | ry<br><i>pho85 (F82G)</i> |
| DCY551 | <i>MATa URA3::GALp::yCas9::HphMX PHO85(F82G) PHO5:[-68 to -92]::AGCTACTACACGAATGGCGTGGGA ade2 can1 his3 leu2 trp1 ura3</i>               | MC050           | ry<br><i>pho85 (F82G)</i> |
| DCY553 | <i>MATa URA3::GALp::yCas9::HphMX PHO85(F82G) PHO5:[-68 to -92]::AGCTACTACACGAATGGCGTGGGA ade2 can1 his3 leu2 trp1 ura3</i>               | MC044           | ry<br><i>pho85 (F82G)</i> |
| FIG S2 |                                                                                                                                          |                 |                           |
| DCY142 | <i>MATa URA3::GALp::yCas9::HphMX ade2 can1 his3 leu2 trp1 ura3</i>                                                                       | MC036           |                           |



|        |                                                                                                                                           |                 |      |
|--------|-------------------------------------------------------------------------------------------------------------------------------------------|-----------------|------|
| DCY271 | <i>MATa URA3::GALp::yCas9::HphMX ade2 can1 his3 leu2 trp1 ura3</i>                                                                        | MC041           |      |
| FIG S3 |                                                                                                                                           |                 |      |
| DCY266 | <i>MATa ade2 can1 his3 leu2 trp1 ura3</i>                                                                                                 | MC014,<br>MC039 |      |
| DCY267 | <i>MATa URA3::GALp::yCas9::HphMX ade2 can1 his3 leu2 trp1 ura3</i>                                                                        | M3844,<br>MC039 |      |
| FIG S4 |                                                                                                                                           |                 |      |
| DCY142 | <i>MATa URA3::GALp::yCas9::HphMX ade2 can1 his3 leu2 trp1 ura3</i>                                                                        | MC036           |      |
| DCY271 | <i>MATa URA3::GALp::yCas9::HphMX ade2 can1 his3 leu2 trp1 ura3</i>                                                                        | MC041           |      |
| DCY298 | <i>MATa URA3::ADH1::yCas9::HphMX ade2 can1 his3 leu2 trp1 ura3</i>                                                                        | MC036           |      |
| DCY300 | <i>MATa URA3::ADH1::yCas9::HphMX ade2 can1 his3 leu2 trp1 ura3</i>                                                                        | MC041           |      |
| FIG S5 |                                                                                                                                           |                 |      |
| DCY136 | <i>MATa URA3::GALp::yCas9::HphMX ade2 can1 his3 leu2 trp1 ura3</i>                                                                        | MC037           |      |
| DCY138 | <i>MATa URA3::GALp::yCas9::HphMX ade2 can1 his3 leu2 trp1 ura3</i>                                                                        | MC038           |      |
| DCY140 | <i>MATa URA3::GALp::yCas9::HphMX ade2 can1 his3 leu2 trp1 ura3</i>                                                                        | MC039           |      |
| DCY142 | <i>MATa URA3::GALp::yCas9::HphMX ade2 can1 his3 leu2 trp1 ura3</i>                                                                        | MC036           |      |
| DCY271 | <i>MATa URA3::GALp::yCas9::HphMX ade2 can1 his3 leu2 trp1 ura3</i>                                                                        | MC041           |      |
| DCY272 | <i>MATa URA3::GALp::yCas9::HphMX ade2 can1 his3 leu2 trp1 ura3</i>                                                                        | MC042           |      |
| DCY309 | <i>MATa URA3::GALp::yCas9::HphMX HO[-240 to -232 deleted]:TTACCCG HO[-160 to -152 deleted]:TTACCCG ade2 can1 his3 leu2 trp1 ura3</i>      | MC037           | Reb1 |
| DCY311 | <i>MATa URA3::GALp::yCas9::HphMX HO[-1708 to -1700 deleted]:TTACCCG HO[-1628 to -11620 deleted]:TTACCCG ade2 can1 his3 leu2 trp1 ura3</i> | MC042           | Reb1 |
| DCY313 | <i>MATa URA3::GALp::yCas9::HphMX HO[-1268 to -1261 deleted]:TTACCCG HO[-1194 to -1187 deleted]:TTACCCG ade2 can1 his3 leu2 trp1 ura3</i>  | MC038           | Reb1 |
| FIG S6 |                                                                                                                                           |                 |      |

|         |                                                                                                                                            |       |      |
|---------|--------------------------------------------------------------------------------------------------------------------------------------------|-------|------|
| DCY466  | <i>MATa URA3::GALp::yCas9::HphMX ade2 can1 his3 leu2 trp1 ura3</i>                                                                         | MC063 |      |
| DCY468  | <i>MATa URA3::GALp::yCas9::HphMX ade2 can1 his3 leu2 trp1 ura3</i>                                                                         | MC064 |      |
| DCY470  | <i>MATa URA3::GALp::yCas9::HphMX ade2 can1 his3 leu2 trp1 ura3</i>                                                                         | MC065 |      |
| FIG S9  |                                                                                                                                            |       |      |
| DCY142  | <i>MATa URA3::GALp::yCas9::HphMX ade2 can1 his3 leu2 trp1 ura3</i>                                                                         | MC036 |      |
| DCY270  | <i>MATa URA3::GALp::yCas9::HphMX ade2 can1 his3 leu2 trp1 ura3</i>                                                                         | MC040 |      |
| DCY271  | <i>MATa URA3::GALp::yCas9::HphMX ade2 can1 his3 leu2 trp1 ura3</i>                                                                         | MC041 |      |
| DCY280  | <i>MATa URA3::GALp::yCas9::HphMX ade2 can1 his3 leu2 trp1 ura3</i>                                                                         | MC060 |      |
| DCY458  | <i>MATa URA3::GALp::yCas9::HphMX HO[-725 to -717 deleted]:TTTACCCG HO[-671 to -663 deleted]:TTTACCCG ade2 can1 his3 leu2 trp1 ura3</i>     | MC036 | Reb1 |
| DCY460  | <i>MATa URA3::GALp::yCas9::HphMX HO[-725 to -717 deleted]:TTTACCCG HO[-671 to -663 deleted]:TTTACCCG ade2 can1 his3 leu2 trp1 ura3</i>     | MC040 | Reb1 |
| DCY462  | <i>MATa URA3::GALp::yCas9::HphMX HO[-913 to -905 deleted]:TTTACCCG HO[-838 to -830 deleted]:TTTACCCG ade2 can1 his3 leu2 trp1 ura3</i>     | MC036 | Reb1 |
| DCY464  | <i>MATa URA3::GALp::yCas9::HphMX HO[-913 to -905 deleted]:TTTACCCG HO[-838 to -830 deleted]:TTTACCCG ade2 can1 his3 leu2 trp1 ura3</i>     | MC060 | Reb1 |
| FIG S10 |                                                                                                                                            |       |      |
| DCY138  | <i>MATa URA3::GALp::yCas9::HphMX ade2 can1 his3 leu2 trp1 ura3</i>                                                                         | MC038 |      |
| DCY142  | <i>MATa URA3::GALp::yCas9::HphMX ade2 can1 his3 leu2 trp1 ura3</i>                                                                         | MC036 |      |
| DCY270  | <i>MATa URA3::GALp::yCas9::HphMX ade2 can1 his3 leu2 trp1 ura3</i>                                                                         | MC040 |      |
| DCY271  | <i>MATa URA3::GALp::yCas9::HphMX ade2 can1 his3 leu2 trp1 ura3</i>                                                                         | MC041 |      |
| DCY280  | <i>MATa URA3::GALp::yCas9::HphMX ade2 can1 his3 leu2 trp1 ura3</i>                                                                         | MC060 |      |
| DCY348  | <i>MATa URA3::GALp::yCas9::HphMX HO[-1818 to -1812 deleted]:TATTCC HO[-1309 to -1299 deleted]:TCGTATCATT ade2 can1 his3 leu2 trp1 ura3</i> | MC036 | a3b3 |

|         |                                                                                                                                            |                 |      |
|---------|--------------------------------------------------------------------------------------------------------------------------------------------|-----------------|------|
| DCY450  | <i>MATa URA3::GALp::yCas9::HphMX HO[-1818 to -1812 deleted]:TATTCC HO[-1309 to -1299 deleted]:TCGTATCATT ade2 can1 his3 leu2 trp1 ura3</i> | MC040           | a3b3 |
| DCY452  | <i>MATa URA3::GALp::yCas9::HphMX HO[-1818 to -1812 deleted]:TATTCC HO[-1309 to -1299 deleted]:TCGTATCATT ade2 can1 his3 leu2 trp1 ura3</i> | MC060           | a3b3 |
| DCY454  | <i>MATa URA3::GALp::yCas9::HphMX HO[-1818 to -1812 deleted]:TATTCC HO[-1309 to -1299 deleted]:TCGTATCATT ade2 can1 his3 leu2 trp1 ura3</i> | MC038           | a3b3 |
| DCY456  | <i>MATa URA3::GALp::yCas9::HphMX HO[-1818 to -1812 deleted]:TATTCC HO[-1309 to -1299 deleted]:TCGTATCATT ade2 can1 his3 leu2 trp1 ura3</i> | MC041           | a3b3 |
| FIG S11 |                                                                                                                                            |                 |      |
| DCY561  | <i>MATa ade2 can1 his3 leu2 trp1 ura3</i>                                                                                                  | M5771,<br>MC036 |      |
| DCY562  | <i>MATa HO[-1708 to -1700 deleted]:TTTACCCG HO[-1628 to -11620 deleted]:TTTACCCG ade2 can1 his3 leu2 trp1 ura3</i>                         | M5771,<br>MC042 | Reb1 |
| DCY563  | <i>MATa ade2 can1 his3 leu2 trp1 ura3</i>                                                                                                  | M5771,<br>MC036 |      |
| DCY564  | <i>MATa HO[-240 to -232 deleted]:TTTACCCG HO[-160 to -152 deleted]:TTTACCCG ade2 can1 his3 leu2 trp1 ura3</i>                              | M5771,<br>MC037 | Reb1 |
| FIG S12 |                                                                                                                                            |                 |      |
| DCY157  | <i>MATa HO[-202 to -178 deleted]:AGCTACTACACGAATGGCGCGTGGGA ade2 can1 his3 leu2 trp1 ura3</i>                                              | M3844,<br>MC036 | ry   |
| DCY159  | <i>MATa HO[-202 to -178 deleted]:AGCTACTACACGAATGGCGCGTGGGA ade2 can1 his3 leu2 trp1 ura3</i>                                              | MC030,<br>MC031 | ry   |
| DCY161  | <i>MATa HO[-1346 to -1322 deleted]:AGCTACTACACGAATGGCGCGTGGGA ade2 can1 his3 leu2 trp1 ura3</i>                                            | M3844,<br>MC036 | ry   |
| DCY163  | <i>MATa HO[-1346 to -1322 deleted]:AGCTACTACACGAATGGCGCGTGGGA ade2 can1 his3 leu2 trp1 ura3</i>                                            | MC030,<br>MC031 | ry   |
| FIG S13 |                                                                                                                                            |                 |      |
| DCY144  | <i>MATa URA3::GALp::yCas9::HphMX ade2 can1 his3 leu2 trp1 ura3</i>                                                                         | MC049           |      |

|        |                                                                                       |                 |    |
|--------|---------------------------------------------------------------------------------------|-----------------|----|
| DCY167 | <i>MATa PHO5:[-68 to -92]::AGCTACTACACGAATGGCGTGGGA ade2 can1 his3 leu2 trp1 ura3</i> | MC030,<br>MC031 | ry |
|--------|---------------------------------------------------------------------------------------|-----------------|----|

**Table S2. Plasmids**

| <b>Plasmid</b> | <b>Description</b>                                                                       | <b>Yeast ORI</b> | <b>Selection</b> |
|----------------|------------------------------------------------------------------------------------------|------------------|------------------|
| M2817          | 3.5kb HO promoter sequence cloned into pUC18                                             | N/A              | Amp              |
| M3844          | pRS415-Gal1 plasmid                                                                      | CEN              | LEU2             |
| M5771          | Adh1p:proteinA:dCas9 fusion expression vector                                            | 2 $\mu$          | TRP1             |
| MC030          | Galp:RyA yeast plasmid                                                                   | CEN              | URA3             |
| MC031          | Galp:RyB yeast plasmid                                                                   | CEN              | LEU2             |
| MC032          | Galp:yCas9 integrating plasmid at <i>URA3</i>                                            | N/A              | KanMx            |
| MC036          | Tet-ON guide RNA plasmid, used as EV                                                     | CEN              | URA3             |
| MC037          | Tet-ON guide RNA plasmid targeting <i>HO</i> -184                                        | CEN              | URA3             |
| MC038          | Tet-ON guide RNA plasmid targeting <i>HO</i> -1235                                       | CEN              | URA3             |
| MC039          | Tet-ON guide RNA plasmid targeting <i>HO</i> -1339                                       | CEN              | URA3             |
| MC040          | Tet-ON guide RNA plasmid targeting <i>HO</i> -706                                        | CEN              | URA3             |
| MC041          | Tet-ON guide RNA plasmid targeting <i>HO</i> -1363                                       | CEN              | URA3             |
| MC042          | Tet-ON guide RNA plasmid targeting <i>HO</i> -1670                                       | CEN              | URA3             |
| MC044          | Tet-ON guide RNA plasmid targeting ry sequence                                           | CEN              | URA3             |
| MC048          | Tet-ON guide RNA plasmid targeting <i>PHO5</i> 1b                                        | CEN              | URA3             |
| MC049          | Tet-ON guide RNA plasmid targeting <i>PHO5</i> 1a                                        | CEN              | URA3             |
| MC050          | Tet-ON guide RNA plasmid targeting <i>PHO5</i> 2b                                        | CEN              | URA3             |
| MC051          | Tet-ON guide RNA plasmid targeting <i>PHO5</i> 2a                                        | CEN              | URA3             |
| MC058          | <i>PHO5</i> promoter cloned into pCR4-TOPO                                               | N/A              | Amp              |
| MC059          | Nsil to AflIII <i>HO</i> promoter sequence containing 1339 ry sequence cloned into M2817 | N/A              | Amp              |
| MC060          | Tet-ON guide RNA plasmid targeting <i>HO</i> -875                                        | CEN              | URA3             |
| MC061          | <i>PHO5</i> promoter with -1 ry cloned into pCR4-TOPO                                    | N/A              | Amp              |
| MC063          | Tet-ON guide RNA plasmid, used as EV                                                     | CEN              | HIS3             |
| MC064          | Tet-ON guide RNA plasmid targeting <i>HO</i> -184                                        | CEN              | HIS3             |
| MC065          | Tet-ON guide RNA plasmid targeting <i>HO</i> -1339                                       | CEN              | HIS3             |

**Table S3. Target sequences for sgRNAs**

| <b>Promoter</b>  | <b>Target</b> | <b>Target sequence</b> | <b>PAM</b> | <b>Strand</b> |
|------------------|---------------|------------------------|------------|---------------|
| <b>HO</b>        | 184           | GCTATTGCTACTCAAATG     | AGG        | top           |
|                  | 689           | TGGTAGACGTGTGTGTCTCA   | TGG        | top           |
|                  | 875           | TGAACCTGGTACGTATATTG   | TGG        | bottom        |
|                  | 1235          | GATTATTTGATACCCCTTT    | GGG        | bottom        |
|                  | 1339          | GATGTATCTCATCGCAGGCA   | CGG        | bottom        |
|                  | 1363          | CAGTACAGTGCCCTGAGCGT   | AGG        | bottom        |
|                  | 1670          | TGTTCTGGAGGCTTTACAAA   | AGG        | top           |
|                  |               |                        |            |               |
| <b>PHO5</b>      | 1a            | GCTGATGTTTTGCTAAGTCG   | AGG        | top           |
|                  | 1b            | TTGCTAAGTCGAGGTTAGTA   | TGG        | top           |
|                  | 2a            | GTCCACGTGTGAGTGCCA     | AGG        | bottom        |
|                  | 2b            | CAACCTTGGCACTCACACGT   | GGG        | top           |
|                  |               |                        |            |               |
| <b>ry target</b> | ry1           | AGCTACTACACGAATGGCGT   | GGG        | top           |

**Table S4. PCR Primers**

| <b>Oligo</b>   | <b>Description</b>                            | <b>Sequence</b>             | <b>Position<br/>Relative to ATG</b> |
|----------------|-----------------------------------------------|-----------------------------|-------------------------------------|
| PCR oligos     |                                               |                             |                                     |
| DC089          | Forward primer for <i>CLN2</i> Southern Probe | GGGTATCTGCGAATTGGAAA        | -1568 to -1550                      |
| DC090          | Reverse primer for <i>CLN2</i> Southern Probe | AGGAGCATAGAGGCGAATGA        | -1100 to -1081                      |
| DC096          | Forward primer for <i>PHO5</i> Southern Probe | G TTCCTTGTTATCCCATCG        | -990 to -971                        |
| DC097          | Reverse primer for <i>PHO5</i> Southern Probe | CGTTGACATATTTGCGCATT        | -571 to -498                        |
| DC116          | Forward primer for <i>HO</i> Southern Probe   | TTCAAAGACGGTGCCATTA         | -2273 to -2254                      |
| DC117          | Reverse primer for <i>HO</i> Southern Probe   | GGCACAATTTTACGTTGGAA        | -1853 to -1834                      |
| DC235          | Forward primer for <i>HO</i> -1339 ry cloning | CACGTAGTTCTTACTGGCAAAG      | -1929 to -1908                      |
| DC236          | Reverse primer for <i>HO</i> -1339 ry cloning | GTTACATCACTTTTCGTGACACA     | -603 to -581                        |
| F3248          | Forward primer for MX cassette conversion     | GACATGGAGGCCCAAGAATAC       |                                     |
| F3249          | Reverse primer for MX cassette conversion     | CGACAGCAGTATAGCGACCA        |                                     |
| RT-qPCR oligos |                                               |                             |                                     |
| DC136          | Forward primer for sgRNA qPCR                 | ACTCGGTGCCACTTTTTCAA        |                                     |
| DC241          | Reverse primer for sgRNA qPCR                 | CAGTACAGTGCCTGAGCGT         |                                     |
| F1860          | Forward primer for qPCR at <i>HO</i> -184     | TGAATTGTA TACCGCTGGG        | -287 to -268                        |
| F1862          | Reverse primer for qPCR at <i>HO</i> -184     | CGAAAAGTTCAACATAACTT        | -247 to -228                        |
| F2087          | Forward primer for qPCR at <i>HO</i> -1670    | AAAGGCGGATCAAGATGTATGAAAG   | -1742 to -1717                      |
| F2088          | Reverse primer for qPCR at <i>HO</i> -1670    | GGAACCATGTGATCTTACGTTGATATG | -1578 to -1551                      |
| F2091          | Forward primer for qPCR at <i>HO</i> -1339    | AAGCTAAGAATTTACATGTTGTTG    | -1471 to -1446                      |

|                  |                                                      |                            |                |
|------------------|------------------------------------------------------|----------------------------|----------------|
| F2092            | Reverse primer for qPCR at <i>HO</i> -1339           | GTTGAGGTCTTTTCTATTCTGATTG  | -1276 to -1250 |
| F2093            | Forward primer for qPCR at <i>HO</i> -1235           | AATGCTGGAGCAAAAATTTCAATCAG | -1295 to -1269 |
| F2094            | Reverse primer for qPCR at <i>HO</i> -1235           | GGAGCCCCTCAGACATTAGCC      | -1142 to -1121 |
| F2153            | Forward primer for qPCR of <i>PHO5</i> ORF           | TTATTCTCGTGGTGTGCATT       | +775 to +795   |
| F2154            | Reverse primer for qPCR of <i>PHO5</i> ORF           | CTTTAATAATTTGACTGAGGCATTG  | +942 to +966   |
| F2430            | Forward primer for qPCR of <i>RPR1</i>               | CACCTATGGGCGGGTTATCAG      |                |
| F2431            | Reverse primer for qPCR of <i>RPR1</i>               | CCTAGGCCGAACCTCCGTGA       |                |
|                  |                                                      |                            |                |
| ChIP-qPCR oligos |                                                      |                            |                |
| DC160            | Forward primer for ChIP at <i>PHO5</i> -2 nucleosome | TTTCGCATAGAACGCAACTG       | -357 to -338   |
| DC161            | Reverse primer for ChIP at <i>PHO5</i> -2 nucleosome | ATGCCTTGCCAAGTAAGGTG       | -171 to -152   |
| DC213            | Forward primer for ChIP at <i>PHO5</i> -56 to -278   | GAATCGATACAACCTTGGA        | -277 to -256   |
| DC214            | Reverse primer for ChIP at <i>PHO5</i> -56 to -278   | TGAAGCCATACTAACCTCGACTT    | -78 to -56     |
| F1399            | Forward primer for ChIP at IG-V control region       | GGCTGTCAGAATATGGGGCCGTAGTA |                |
| F1400            | Reverse primer for ChIP at IG-V control region       | CACCCCGAAGCTGCTTTCACAATAC  |                |
| F1860            | Forward primer for ChIP at <i>HO</i> -184            | TGAATTGTACTACCGCTGGG       | -287 to -268   |
| F1881            | Reverse primer for ChIP at <i>HO</i> -184            | AGTAGCAATAGCTGTTACT        | -207 to -188   |
| F1883            | Alternate Reverse primer for ChIP at <i>HO</i> -184  | GCTTCATCATGCTTCAACAA       | -167 to -148   |



|       |                                                      |                             |                |
|-------|------------------------------------------------------|-----------------------------|----------------|
| F1908 | Forward primer for ChIP at <i>HO</i> -1670           | CGGATCAAGATGTATGAAAG        | -1737 to -1718 |
| F1928 | Reverse primer for ChIP at <i>HO</i> -1670           | GGATAAGATCGCACCTAACA        | -1657 to -1638 |
| F1960 | Forward primer for ChIP at <i>HO</i> -875            | AAAATATACACAAACGCCAC        | -897 to -878   |
| F1983 | Reverse primer for ChIP at <i>HO</i> -875            | AATCGACGACGGTCACATTA        | -817 to -798   |
| F1966 | Forward primer for ChIP at <i>HO</i> -689            | ATCTGACAACATGGTAGACG        | -717 to -698   |
| F1989 | Reverse primer for ChIP at <i>HO</i> -689            | CCCTTAAGCCCTGTGTAGGA        | -637 to -618   |
| F2001 | Forward primer for ChIP at <i>HO</i> -1235           | CCTCAACAGTAATTAACCCA        | -1257 to -1238 |
| F2005 | Reverse primer for ChIP at <i>HO</i> -1235           | TTTTACGCGATTCCGGCCCAA       | -1177 to -1158 |
| F2087 | Forward primer for dCas9 ChIP at <i>HO</i> -1670     | AAAGGCGGATCAAGATGTATGAAAG   | -1742 to -1717 |
| F2088 | Reverse primer for dCas9 ChIP at <i>HO</i> -1670     | GGAACCATGTGATCTTACGTTGATATG | -1578 to -1551 |
| F2091 | Forward primer for ChIP at <i>HO</i> -1339           | AAGCTAAGAATTTACATGTTGTTG    | -1471 to -1446 |
| F2092 | Reverse primer for ChIP at <i>HO</i> -1339           | GTTGAGGTCTTTTCTATTTCTGATTG  | -1276 to -1250 |
| F2119 | Forward primer for dCas9 ChIP at <i>HO</i> -184      | ACCATTGGTACCTACTACTTTGAAT   | -307 to -282   |
| F2120 | Reverse primer for dCas9 ChIP at <i>HO</i> -184      | GCCATTTAGAATAGGAATTGAATAC   | -100 to -75    |
| F2647 | Forward primer for ChIP at <i>PHO5</i> -1 nucleosome | CACCTTACTTGGCAAGGCATA       | -171 to -150   |
| F2648 | Reverse primer for ChIP at <i>PHO5</i> -1 nucleosome | GTAATCTCGAATTTGCTTGCTCTATT  | -28 to -2      |
| F3201 | Forward primer for ChIP at IG-1 control nucleosome   | TGTCACGTAGGTAAAACACTTGC     |                |
| F3202 | Reverse primer for ChIP at IG-1 control nucleosome   | CCTTGATGGCGTGCTTAACT        |                |

## Reference

1. DeWitt MA, *et al.* (2016) Selection-free genome editing of the sickle mutation in human adult hematopoietic stem/progenitor cells. *Science translational medicine* 8(360):360ra134.
